# Supplementary material for: Amphiphilic multi-targeting copolymer micelles efficiently deliver pZNF580 to promote endothelial cell proliferation and migration
Source: Royal Society of Chemistry journal article supplement (doi:10.1039/d3tb02849f), 2024-01-01
Supplement: d3tb02849f1.pdf [file d3tb02849f1.pdf]

## Supporting Information

### **Amphiphilic multi-targeting copolymer micelles efficiently deliver pZNF580 to promote endothelial cell proliferation and migration**

Chen Li<sup>ab †</sup>, Qirong Xu<sup>ab †</sup>, Xiangyan Meng<sup>c</sup>, Xinghong Duo<sup>\*ab</sup>, Yakai Feng<sup>\*de</sup>

\* Corresponding authors

a School of Chemistry and Chemical Engineering, Qinghai University for Nationalities, Xining, Qinghai, 810007, PR China. E-mail: [wlkdxh@tju.edu.cn](mailto:wlkdxh@tju.edu.cn)

b Key Laboratory of National Ethnic Affairs Commission of Resource Chemistry and Ecological Environment Protection on Qinghai-Tibet Plateau, Xining, Qinghai, 810007, PR China

c Institute of Disaster and Emergency Medicine, Tianjin University, Tianjin, 300072, PR China

d School of Chemical Engineering and Technology, Tianjin University, Tianjin, 300350, PR China. E-mail: [yakaifeng@tju.edu.cn](mailto:yakaifeng@tju.edu.cn)

e Key Laboratory of Systems Bioengineering (Ministry of Education), Tianjin University, Tianjin, 300072, PR China

† These authors contributed equally to this work and should be regarded as co-first.

## Experimental Methods

### Preparation and characterization of copolymers

#### Preparation and characterization of P(CL-co-MMD)(PCLMD).

PCLMD copolymers were obtained by initiating the ring-opening polymerization of  $\epsilon$ -caprolactone with 3-methylmorpholine-2,5-dione (MMD) using saturated short-chain diols ( $C_nH_{2n+2}O_2$ ,  $n=8$ ) as initiator and stannous octanoate ( $Sn(Oct)_2$ ) as catalyst. MMD (2.68 g),  $\epsilon$ -caprolactone (8.0 mL), 1,8-octanediol (0.30 g) and freshly prepared  $Sn(Oct)_2$  (1 mL) toluene solution were added to the polymerization tube and sealed in a nitrogen atmosphere. After 3 times of vacuum filling with nitrogen, the reaction was carried out at 150 °C for 24 h. The crude product was dissolved with trichloromethane and precipitated with excess cold  $CHCl_3$ . The precipitate was dried under vacuum for 24 h to obtain the product PCLMD.

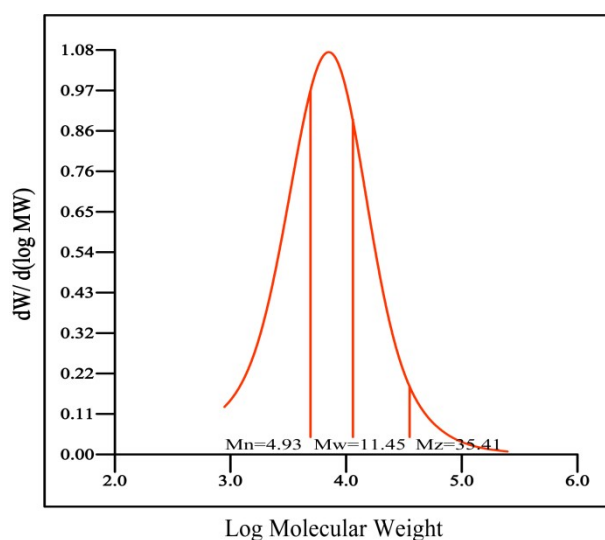

Figure S1. The GPC curve of polymer PCLMD.

#### Preparation and characterization of P(CL-co-MMD)-g-PPEGMA (PCLMD-PPEGMA) copolymer.

According to the method reported in the literature<sup>33</sup>, PCLMD-PPEGMA copolymer was synthesized through ATRP atom transfer radical polymerization using PCLMD-Br as the

macroinitiator and CuBr/bipyridine as the catalyst. Dissolve P(CL-co-MMD)-Br (3.5 g), PEGMA (2.5 g, 5.0 mmol) and bipyridine (0.1 g, 0.60 mmol) in 10 mL of 2-butanone in a dry Schlenk flask. After the mixture was degassed through freeze-vacuum-thaw cycles (3 times), CuBr (0.07 g, 0.40 mmol) was added to the Schlenk flask under nitrogen protection. After three freeze-vacuum-thaw cycles, the reaction was carried out at 50 °C for 24 h. The solution was then passed through a neutral alumina (Al<sub>2</sub>O<sub>3</sub>) column using chloroform as the eluent to remove the copper catalyst. PCLMD-PPEGMA copolymer was obtained by precipitating in cold n-hexane and drying in vacuum until constant weight. A nanoparticle sizer (Zetasizer 3000 HS, Malvern Instruments, UK) was used to measure the particle size and zeta potential of the copolymer.

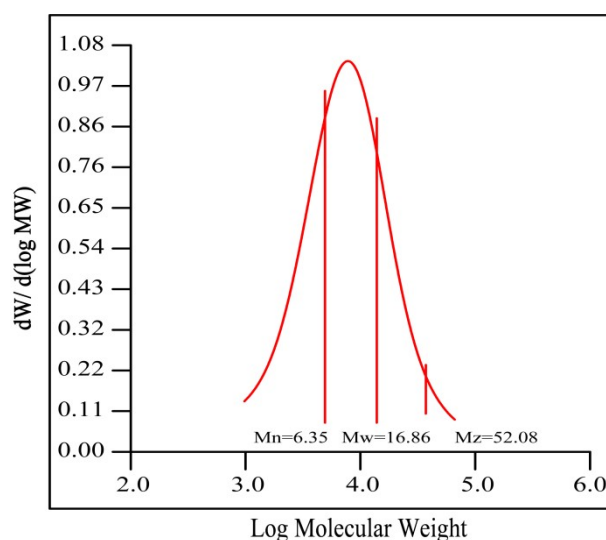

**Figure S2. The GPC curve of polymer PCLMD-PPEGMA.**

**Preparation and characterization of P(CL-co-MMD)-g-PPEGMA-g-NLS-TAT-REDV (PCLMD-PPEGMA-NLS-TAT-REDV) copolymer.**

It was prepared by introducing NLS-TAT-REDV polypeptide onto PCLMD-PPEGMA using NHS-PEG-OPSS as the linking agent. Dissolve 0.25 g PCLMD-PPEGMA in 25 mL DMSO. Take 5 mL of 10 mg/mL PCLMD-PPEGMA copolymer solution in a bottle with magnetic stirring, and add 5 mL of 10 mg/mL OPSS-PEG-NHS DMSO solution dropwise.

After stirring for 2 h, 5 mL of 10 mg/mL DMSO solution containing NLS-TAT-REDV polypeptide was added, and then the reaction was stirred at room temperature overnight. The product was subjected to dialysis and freeze-drying before use.

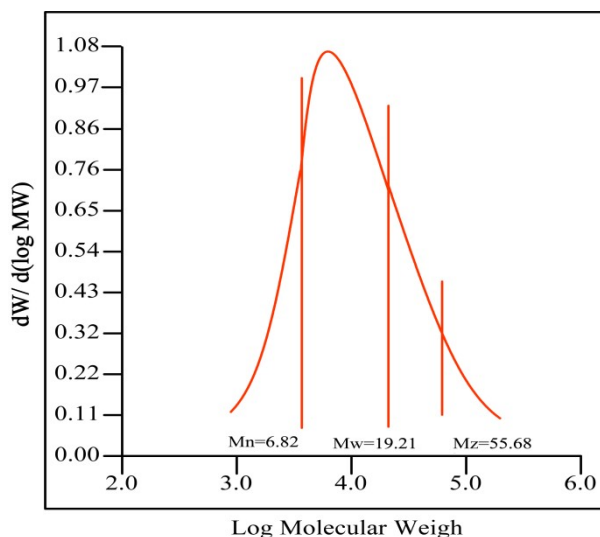

**Figure S3. The GPC curve of polymer PCLMD-PPEGMA-NLS-TAT-REDV.**

**Table 1. The Mn and Mw values for PCLMD, PCLMD-PPEGMA and PCLMD-PPEGMA-NLS-TAT-REDV.**

| Sample                               | Mn (kDa) | Mw (kDa) | Mz (kDa) | Mw/Mn |
|--------------------------------------|----------|----------|----------|-------|
| PCL-co-MMD                           | 4.93     | 11.45    | 35.41    | 2.32  |
| (PCL-co-MMD)-g-PPEGMA                | 6.35     | 16.86    | 52.08    | 2.65  |
| (PCL-co-MMD)-g-PPEGMA-g-NLS-TAT-REDV | 6.82     | 19.21    | 55.68    | 2.82  |

#### **Preparation and characterization of gene complex micelles.**

The 0.5 mg/mL pZNF580 (dissolved in PBS) was added dropwise to the PCLMD-PPEGMA-NLS-TAT-REDV solution and mixed, and allowed to stand at room temperature for 30 min. pZNF580 concentration was adjusted to obtain different weight ratios of ( $w/w_{pZNF580} = 0.25, 0.5, 1, 2, 3, 4$ ) multi-targeting gene complex micelles (TCMs@pZNF580). NTCMs@pZNF580 were prepared using the same method. A nanoparticle sizer (Zetasizer 3000 HS, Malvern Instruments, UK) was used to measure the particle size and zeta potential of

the gene complex micelles.

**Table 2. The changes of particle size, PDI and zeta-potential for PCLMD-PPEGMA-NLS-TAT-REDV/pZNF580.**

| W/W <sub>pZNF580</sub> | Size (nm)   | PDI       | Zeta potential (mV) |
|------------------------|-------------|-----------|---------------------|
| 0.25                   | 165.68±0.95 | 0.30±0.06 | 24.58±1.25          |
| 0.5                    | 168.35±2.80 | 0.41±0.27 | 24.26±1.32          |
| 1                      | 172.42±1.67 | 0.34±0.15 | 23.85±0.54          |
| 2                      | 181.15±1.74 | 0.35±0.16 | 23.58±1.75          |
| 3                      | 183.86±1.32 | 0.31±0.12 | 23.51±1.45          |
| 4                      | 189.31±0.25 | 0.30±0.08 | 23.28±0.75          |

## References

[33] Q. Li, X. F. Hao, J. Lv, X. K. Ren, K. Y. Zhang, I. Ullah, Y. K. Feng, C. C. Shi and W. C. Zhang, *J. Mater. Chem. B*, 2017, **5**, 1673-1687.
